# Supplementary material
Source: PubMed Central journal article supplement (PMC4439945)
Supplement: jcav06p0583s1.pdf [file jcav06p0583s1.pdf]

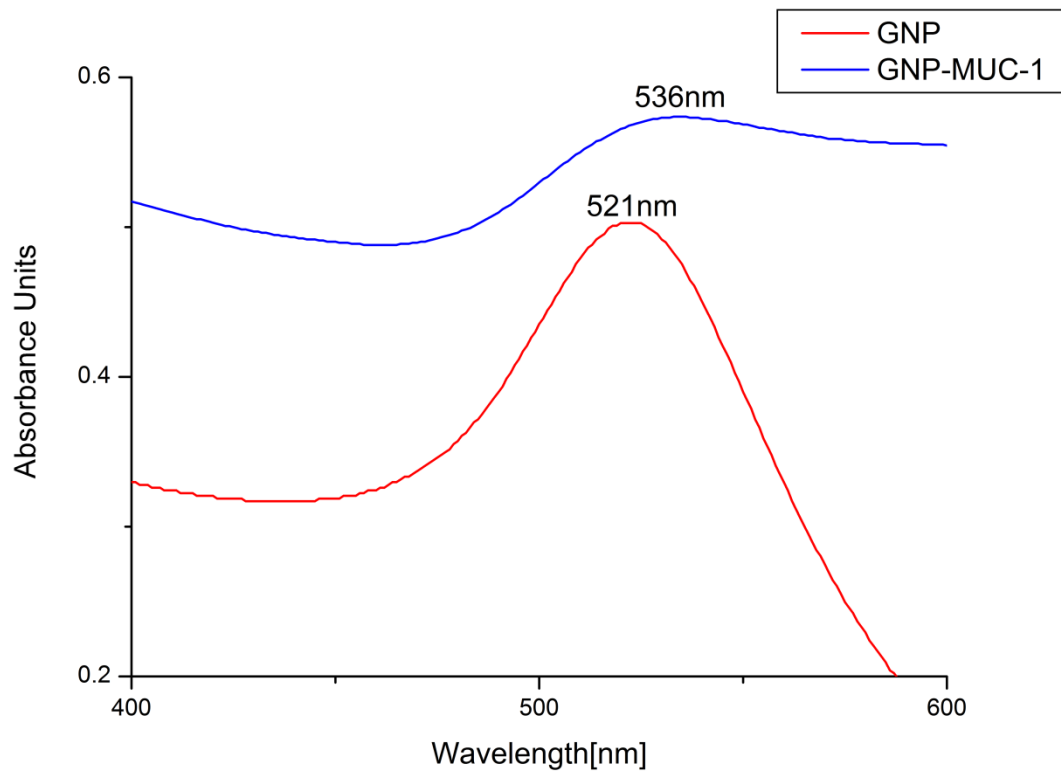

**Figure S1.** UV-Vis spectra of GNP (red line) and GNP-MUC-1 (blue line);

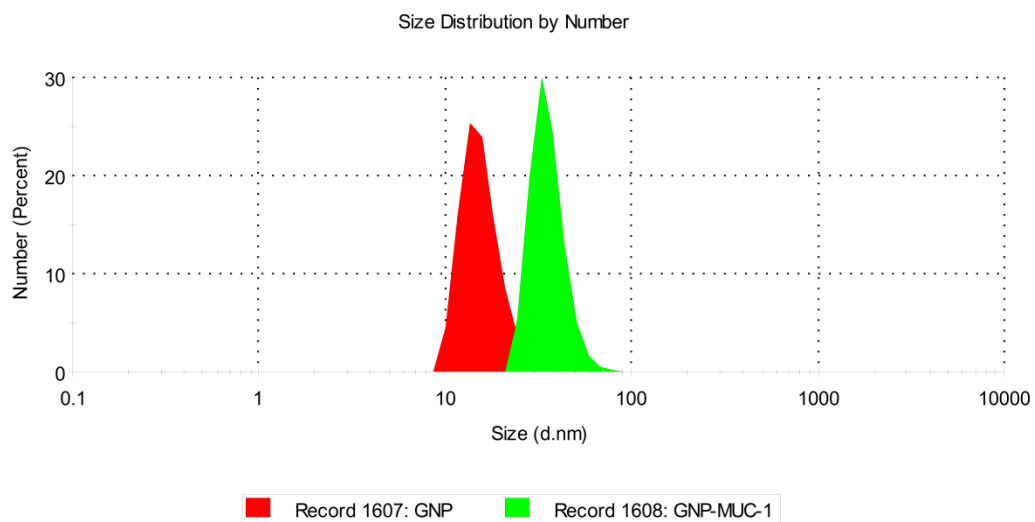

**Figure S2.** Dynamic light scattering size distribution curves for GNP (red) and GNP-MUC-1 (green).
